# Supplementary material
Source: publisher figshare collection journal article supplement (https://gsajournals.figshare.com/ndownloader/files/21324300)
Supplement: Supplementary file 1 [file 21324300]

## Sheet: Table S1
Table S1. Genomic data used in this study and their sources.
Species	assembly version	References
Alligator_mississippiensis	GCF_000281125.3	St John et al. 2012
Anolis_carolinensis	GCF_000090745.1	Alföldi et al. 2011
Chrysemys_picta_bellii	GCF_000241765.3	Badenhorst et al. 2015
Deinagkistrodon_acutus	http://gigadb.org/dataset/100196	Yin et al. 2016
Gallus_gallus	GCF_000002315.5	International Chicken Genome Sequencing Consortium 2004
Ophiophagus_hannah	GCA_000516915.1	Vonk et al. 2013
Python_bivittatus	GCF_000186305.1	Castoe et al. 2011
Xenopus_tropicalis	GCF_000004195.3	Hellsten et al. 2010
References:
Alföldi, J., F. Di Palma, M. Grabherr, C. Williams, L. Kong et al., 2011 The genome of the green anole lizard and a comparative analysis with birds and mammals. Nature 477 (7366):587.
Badenhorst, D., L.W. Hillier, R. Literman, E.E. Montiel, S. Radhakrishnan et al., 2015 Physical mapping and refinement of the painted turtle genome (Chrysemys picta) inform amniote genome evolution and challenge turtle-bird chromosomal conservation. Genome biology and evolution 7 (7):2038-2050.
Castoe, T.A., A.J. de Koning, K.T. Hall, K.D. Yokoyama, W. Gu et al., 2011 Sequencing the genome of the Burmese python (Python molurus bivittatus) as a model for studying extreme adaptations in snakes. Genome biology 12 (7):406.
International Chicken Genome Sequencing Consortium, 2004 Sequence and comparative analysis of the chicken genome provide unique perspectives on vertebrate evolution. Nature 432 (7018):695.
Hellsten, U., R.M. Harland, M.J. Gilchrist, D. Hendrix, J. Jurka et al., 2010 The genome of the Western clawed frog Xenopus tropicalis. Science 328 (5978):633-636.
St John, J.A., E.L. Braun, S.R. Isberg, L.G. Miles, A.Y. Chong et al., 2012 Sequencing three crocodilian genomes to illuminate the evolution of archosaurs and amniotes. Genome biology 13 (1):415.
Vonk, F.J., N.R. Casewell, C.V. Henkel, A.M. Heimberg, H.J. Jansen et al., 2013 The king cobra genome reveals dynamic gene evolution and adaptation in the snake venom system. Proceedings of the National Academy of Sciences 110 (51):20651-20656.
Yin, W., Z.-j. Wang, Q.-y. Li, J.-m. Lian, Y. Zhou et al., 2016 Evolutionary trajectories of snake genes and genomes revealed by comparative analyses of five-pacer viper. Nature communications 7:13107.
